# Supplementary material for: Tetranuclear zinc cluster: a dual purpose catalyst for per-O-acetylation and de-O-acetylation of carbohydrates
Source: Royal Society of Chemistry journal article supplement (doi:10.1039/c6ra12050d), 2016-01-01

## Supporting Information

### **Tetranuclear Zinc cluster: a dual purpose catalyst for per-*O*-acetylation and de-*O*-acetylation of carbohydrates**

Ting-Wei Lin,<sup>°</sup> Avijit K. Adak<sup>°</sup> Hong-Jyune Lin, Anindya Das, Wei-Chen Hsiao, Ting-Chun Kuan and Chun-Cheng Lin<sup>\*</sup>

Department of Chemistry, National Tsing Hua University. Hsinchu-300, Taiwan.

<sup>°</sup> Authors have equal contribution

| <b>Table of contents:</b> | <b>Page No.</b> |
|---------------------------|-----------------|
| 1. NMR spectra:.....      | 2-11            |

7.791  
7.703  
7.693  
7.685  
7.675  
7.416  
7.398  
7.379  
7.349  
7.346  
7.343  
7.340  
7.330  
7.327  
7.325  
7.322  
7.311  
7.309  
7.306  
7.303  
4.834  
4.771  
4.740  
4.555  
4.460  
4.440  
4.429  
4.268  
4.252  
4.208  
4.195  
4.183  
4.170  
3.899  
3.899  
3.894  
3.886  
3.869  
3.864  
3.850  
3.743  
3.707  
3.693  
3.677  
3.663  
3.652  
3.462  
3.442  
3.397  
3.375  
3.349  
3.345  
3.318  
3.314  
3.310  
3.306  
3.302  
3.282

Current Data Parameters  
 NAME LTM-435.fid  
 EXPNO 1  
 PROCNO 1  
 F2 - Processing parameters  
 SI 32768  
 SF 399.764336 MHz  
 WDW EM  
 SSB 0  
 LB 0.30 Hz  
 GB 0  
 PC 1.00

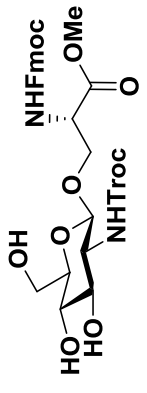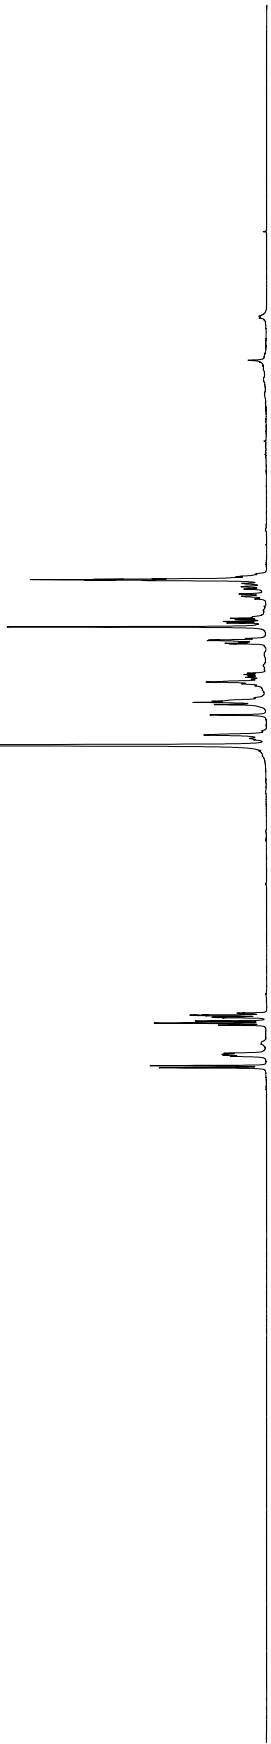

13  
12  
11  
10  
9  
8  
7  
6  
5  
4  
3  
2  
1  
0  
-1 ppm

2.29  
2.07  
2.38  
2.35  
2.25  
0.76  
3.04  
2.19  
1.12  
2.31  
3.00  
1.78  
1.21  
1.45  
0.89

48.30  
 48.37  
 48.58  
 48.79  
 49.00  
 49.22  
 49.43  
 49.64  
 53.10  
 55.75  
 58.96  
 62.67  
 68.33  
 69.79  
 71.97  
 75.50  
 75.67  
 78.01  
 97.04  
 102.92  
 120.95  
 126.27  
 126.36  
 128.23  
 128.84  
 142.53  
 145.07  
 145.15  
 157.19  
 158.41  
 172.25

```

Current Data Parameters
NAME      LW-43
EXPNO    7
PROCNO   1

F2 - Acquisition Parameters
Date_    20140828
Time     14.53
INSTRUM  spect
PROBHD   5 mm DUL
PULPROG  zgpg30
TD        65536
SOLVENT  MeOD
NS        582
DS        0
SWH       2272.273 Hz
AQ        0.2186 Hz
RG        1.4118420 Sec
RG        2050
DW        22.000 use
DE        6.00 use
TE        300.0 K
D1        2.0000000 sec
DELTA    0.0000000 sec
TD0       1.8999998 sec
TD0       1

===== CHANNEL f1 =====
NUC1      13C
P1        9.70 use
PL1       0.50 dB
SFO1      100.6288660 MHz

===== CHANNEL f2 =====
CPDPRG2   waltz16
NUC2      1H
PCPD2     90.00 use
PL2       -2.40 dB
PL12      18.10 dB
PL13      18.10 dB
SFO2      400.1516010 MHz

F2 - Processing parameters
SI        32768
SF        100.6176604 MHz
SWM       0
LB        0
GB        0
PC        1.00
  
```

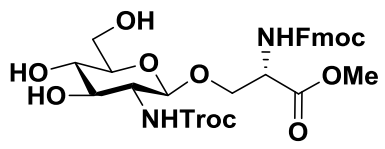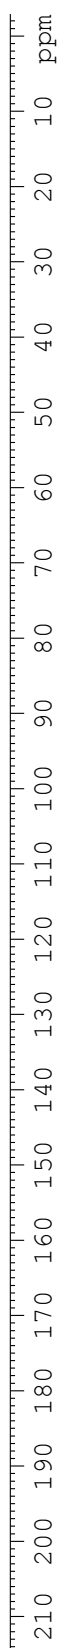

7.365  
7.347  
7.335  
7.317  
7.313  
7.304  
7.298  
7.288  
7.282  
7.279  
7.271  
7.261  
7.254  
7.240  
7.224  
7.206  
7.188  
7.171  
7.152  
5.368  
5.359  
4.927  
4.863  
4.755  
4.728  
4.714  
4.701  
4.685  
4.596  
4.586  
4.567  
4.556  
4.496  
4.476  
4.465  
4.435  
4.400  
4.369  
4.364  
4.344  
4.196  
4.165  
3.550  
3.541  
3.519  
3.511  
3.503  
3.496  
3.286  
3.272  
3.205  
3.188  
1.966  
1.925  
1.500  
1.390  
1.380

Current Data Parameters  
NAME LITW-428  
EXPNO 1  
PROCNO 1

F2 - Acquisition Parameters  
Date\_ 20140623  
Time\_ 10.35  
INSTRUM spect  
PROBHD 5 mm DUL 13c-1  
PULPROG zg30  
TD 32768  
SOLVENT CDCl3  
NS 16  
DS 0  
SWH 6410.256 Hz  
FIDRES 0.195625 Hz  
AQ 2.5559540 sec  
RG 128  
DW 78.000 usec  
DE 30.00 usec  
TE 300.2 K  
D1 2.0000000 sec  
TD0 1

==== CHANNEL f1 =====  
NUC1 1H  
P1 10.00 usec  
PL1 -2.40 dB  
SFO1 400.1528010 MHz

F2 - Processing parameters  
SI 16384  
SF 400.1500172 MHz  
WDW EM  
SSB 0  
LB 0 Hz  
GB 0  
PC 1.00

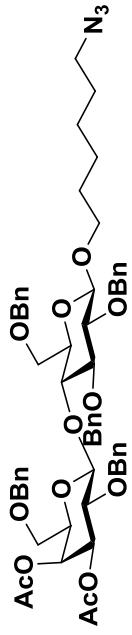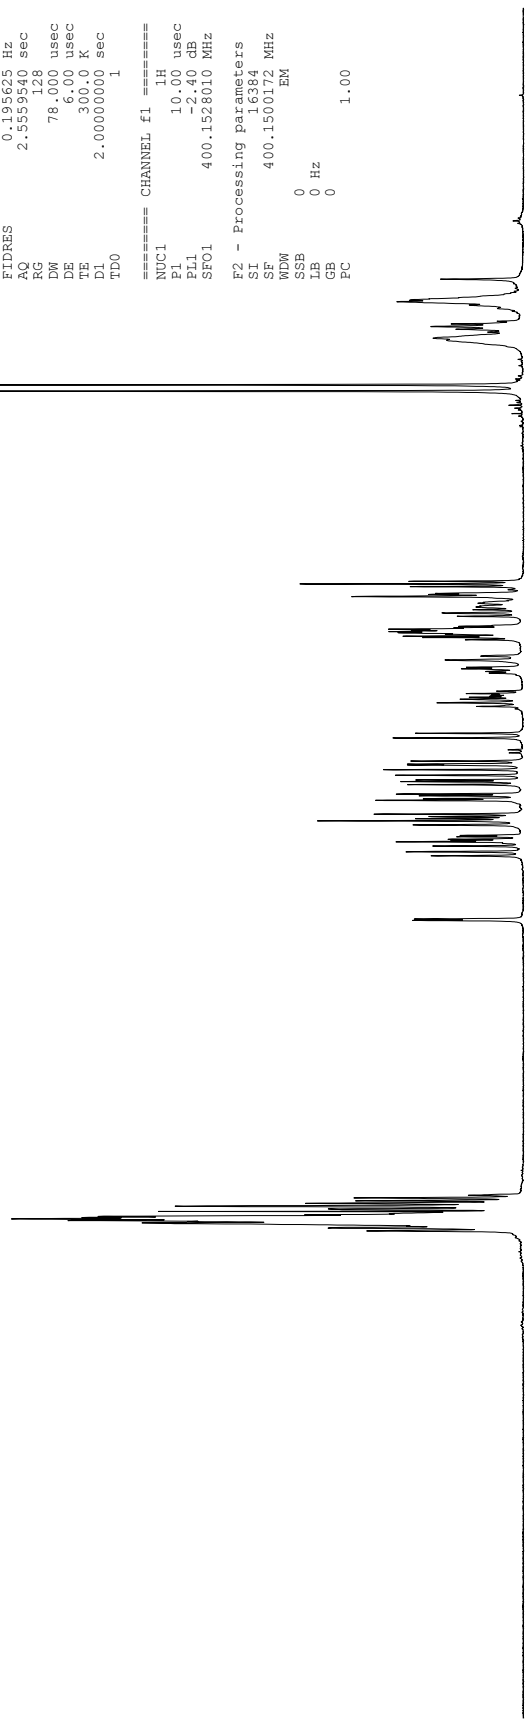

| Chemical Shift (ppm) | Integration |
|----------------------|-------------|
| 18.89                | 7.21        |
| 7.21                 | 1.00        |
| 7.06                 | 1.06        |
| 0.90                 | 1.16        |
| 1.16                 | 2.09        |
| 1.07                 | 1.07        |
| 1.12                 | 1.12        |
| 0.99                 | 1.01        |
| 1.01                 | 1.06        |
| 1.96                 | 1.04        |
| 0.11                 | 1.04        |
| 1.04                 | 1.04        |
| 1.97                 | 1.01        |
| 1.01                 | 1.04        |
| 1.04                 | 4.44        |
| 2.26                 | 1.89        |
| 1.89                 | 1.82        |
| 1.82                 | 3.11        |
| 3.11                 | 3.04        |
| 3.04                 | 3.01        |
| 3.01                 | 2.17        |
| 2.17                 | 3.89        |
| 3.89                 | 0.75        |
| 0.75                 |             |

169.95  
169.87  
138.92  
138.57  
138.17  
137.92  
137.76  
128.31  
128.26  
128.20  
128.16  
127.93  
127.88  
127.80  
127.76  
127.67  
127.56  
127.52  
127.44  
127.24  
103.52  
102.26  
82.63  
81.59  
77.33  
77.01  
76.69  
76.36  
75.15  
74.82  
73.13  
72.76  
71.36  
69.64  
67.91  
67.74  
66.66  
51.23  
50.55  
29.48  
28.66  
26.41  
25.63  
20.59  
20.53

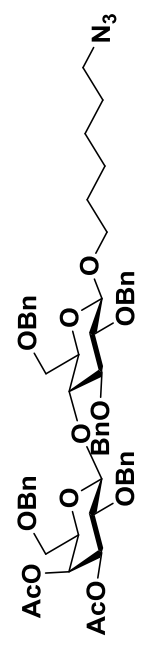

Current Data Parameters  
 NAME ITW-428  
 EXENO 2  
 PROCNO 1

F2 - Acquisition Parameters  
 Date 20140623  
 Time 10:58  
 INSTRUM spect  
 PROBHD 5 mm DUL 13C-1  
 PULPROG zgpg30  
 F2 125.76  
 SOLVENT CDCl3  
 NS 200  
 DS 0  
 SWH 22727.273 Hz  
 FIDRES 0.346791 Hz  
 AQ 1.4418420 sec  
 SFO1 100.628660 MHz  
 DM 22.000 use  
 DE 6.000 use  
 TE 300.0 K  
 D1 2.00000000 sec  
 d11 0.03000000 sec  
 DELTA 1.89999998 sec  
 TDO 1

==== CHANNEL f1 =====  
 NUC1 13C  
 P1 9.70 use  
 PL1 -0.50 dB  
 SFO1 100.628660 MHz

==== CHANNEL f2 =====  
 CPDPRG2 waltz16  
 NUC2 1H  
 FCED2 90.00 use  
 PL2 -2.40 dB  
 PL12 15.10 dB  
 PL13 15.10 dB  
 SFO2 400.1516010 MHz

F2 - Processing parameters  
 SI 32768  
 SF 100.6178138 MHz  
 SWH 0  
 SSB 0  
 LB 3.000 Hz  
 GB 0  
 FC 1.00

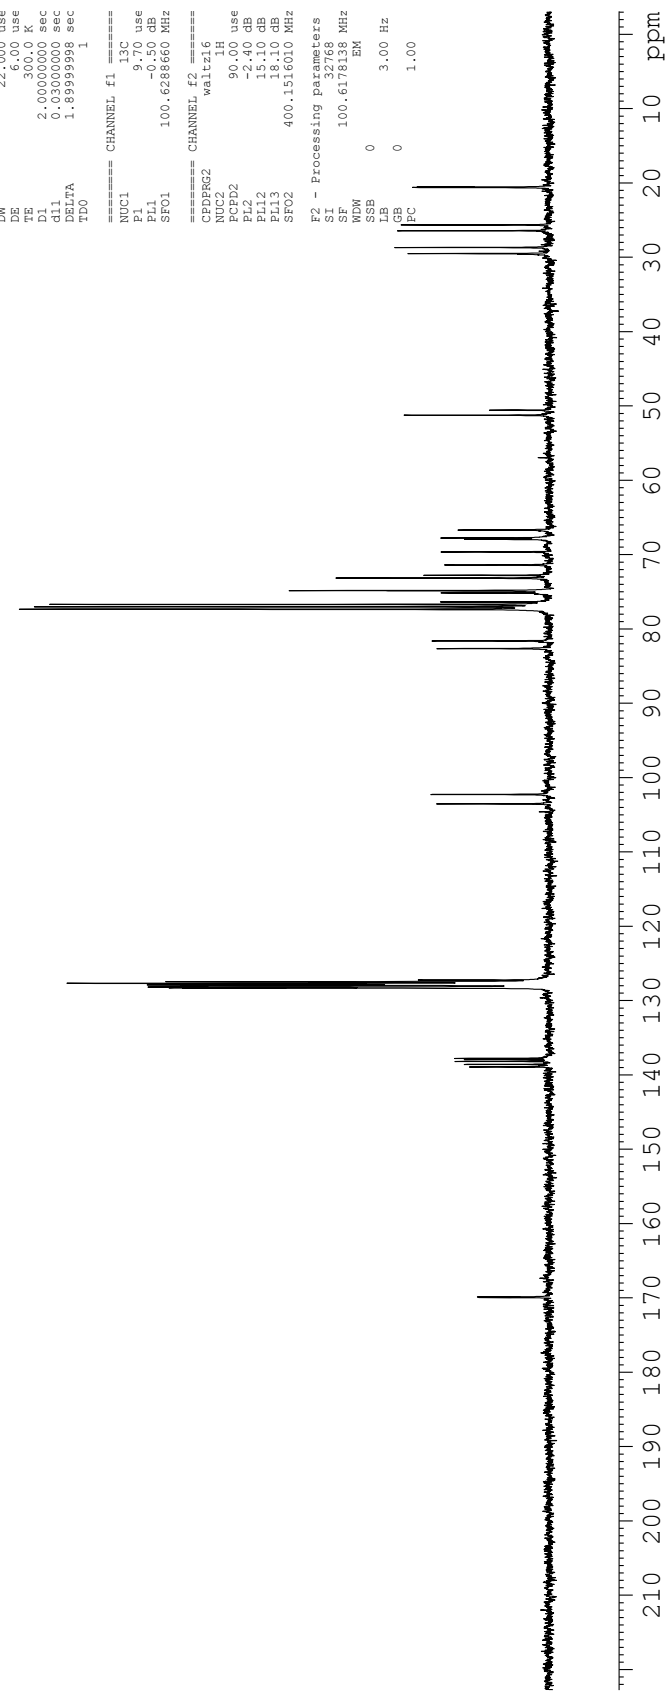

7.761  
 7.743  
 7.598  
 7.580  
 7.409  
 7.390  
 7.371  
 7.322  
 7.303  
 7.285  
 7.241  
 5.940  
 5.925  
 5.912  
 5.899  
 5.883  
 5.870  
 5.856  
 5.842  
 5.609  
 5.590  
 5.347  
 5.304  
 5.274  
 5.248  
 5.245  
 4.672  
 4.660  
 4.640  
 4.631  
 4.507  
 4.497  
 4.479  
 4.469  
 4.417  
 4.415  
 4.399  
 4.384  
 4.376  
 4.356  
 4.347  
 4.241  
 4.223  
 4.206  
 2.051

```

Current Data Parameters
NAME      LITW-425
EXPNO    1
PROCNO   1

F2 - Acquisition Parameters
Date_    20140613
Time     17.24
INSTRUM spect
PROBHD   5 mm DUL 13C-1
PULPROG zg30
TD       32768
SOLVENT  CDCl3
NS       7
DS       0
SWH      6410.256 Hz
FIDRES   0.153825 Hz
AQ       2.5559744 sec
RG       44
DM       78.000 usec
DE       6.00 usec
TE       300.0 K
D1       2.00000000 sec
TD0      1

===== CHANNEL f1 =====
NUC1     1H
P1       10.00 usec
PL1      -2.40 dB
SFO1     400.1528010 MHz

F2 - Processing parameters
SI       16384
SF       400.1500168 MHz
WDW      EM
SSB      0
LB       0 Hz
GB       0
PC       1.00
  
```

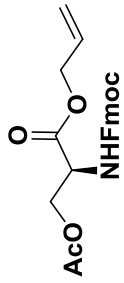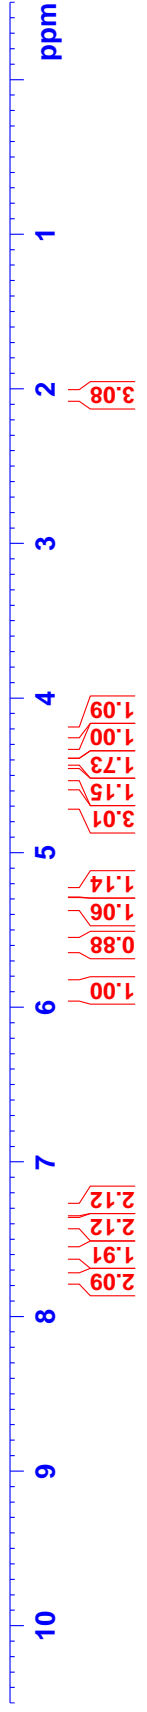

Current Data Parameters  
 NAME LTM-425  
 EXPNO 2  
 PROCNO 1

F2 - Acquisition Parameters  
 Date\_ 20140613  
 Time\_ 17.26  
 INSTRUM spect  
 PROBHD 5 mm DUL 13C-1  
 PULPROG zgpg30  
 TD 65536  
 SOLVENT CDCl3  
 NS 230  
 DS 0  
 SMH 22727.273 Hz  
 FIDRES 0.346791 Hz  
 AQ 1.4416220 sec  
 RG 2050  
 DM 22.000 use  
 DE 6.00 use  
 TE 300.0 K  
 D1 2.00000000 sec  
 d11 0.03000000 sec  
 DELTA 1.89999998 sec  
 TDO 1

==== CHANNEL f1 =====  
 NUC1 13C  
 P1 9.70 use  
 PL1 -0.50 dB  
 SFO1 100.6288660 MHz

==== CHANNEL f2 =====  
 CPDPRG2 waltz16  
 NUC2 1H  
 P2 90.00 use  
 PL2 -2.40 dB  
 PL12 15.10 dB  
 PL13 16.10 dB  
 SFO2 400.1516010 MHz

F2 - Processing parameters  
 SI 32768  
 SF 100.6178029 MHz  
 WDW EM  
 SSB 0  
 GB 0  
 PC 1.00

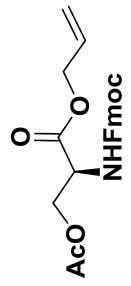

170.44  
 169.15  
 155.73  
 143.75  
 143.65  
 141.28  
 131.19  
 127.73  
 127.06  
 125.04  
 119.98  
 119.12

77.32  
 77.00  
 76.69  
 67.26  
 66.49  
 64.00  
 53.41  
 47.08  
 20.62

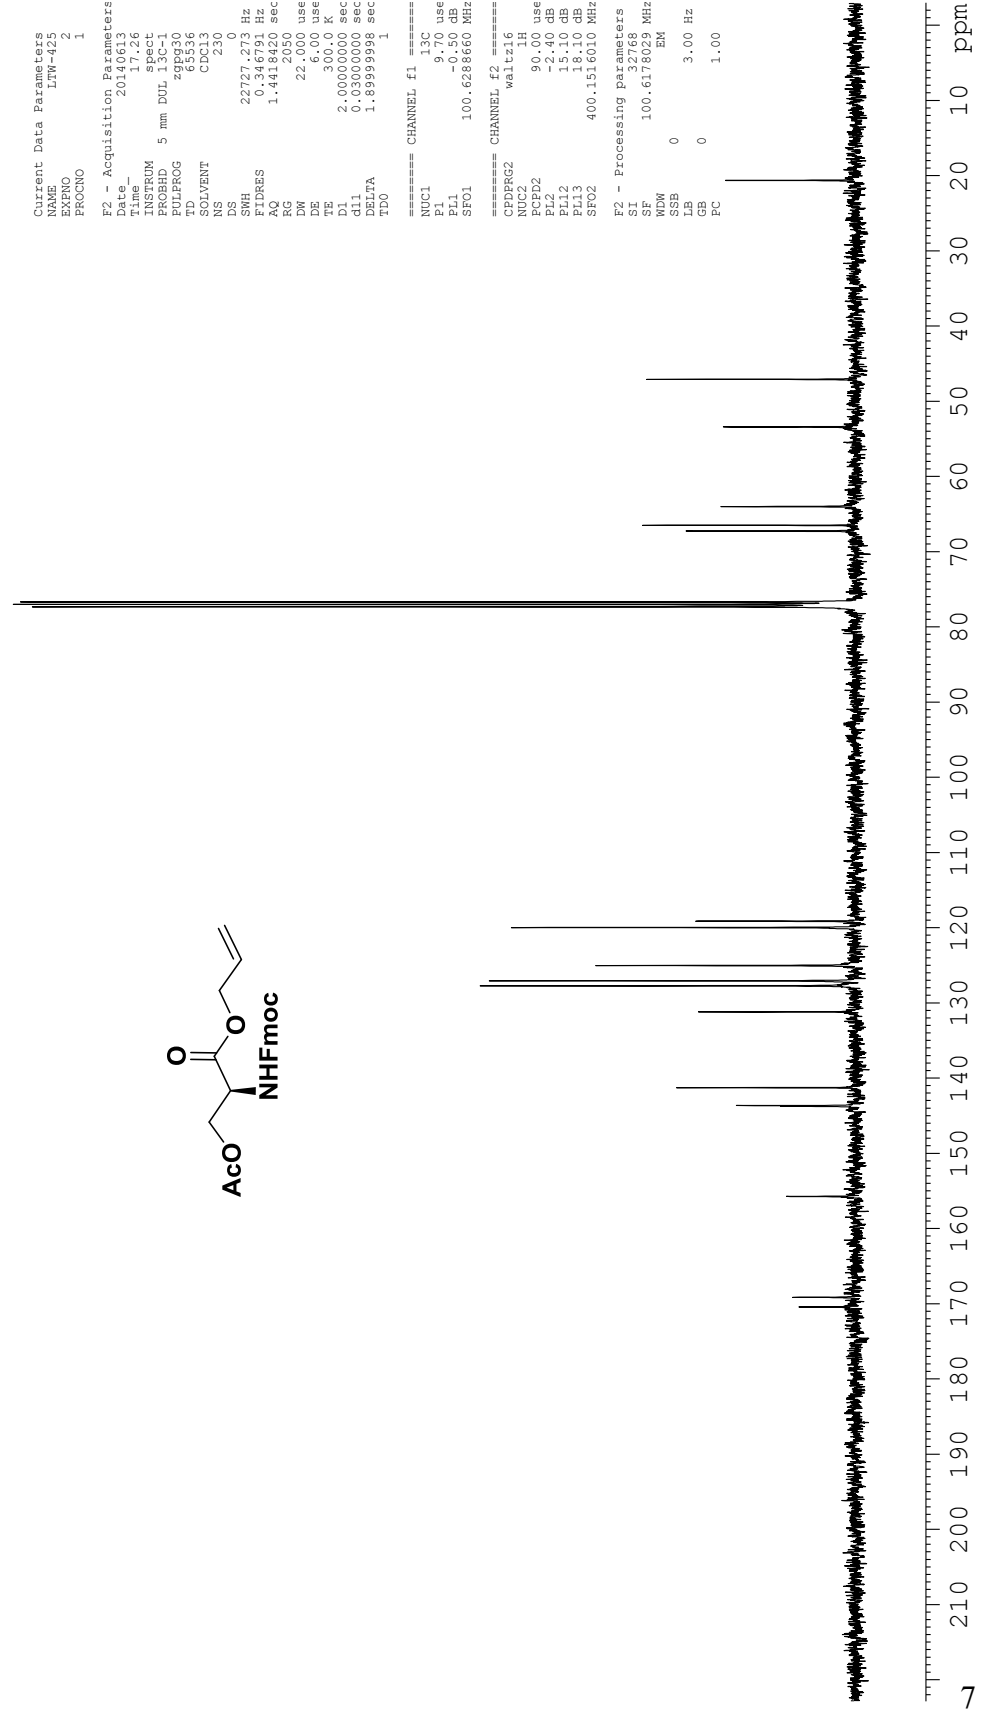





170.41  
 169.46  
 155.10  
 131.30  
 118.85  
 80.24  
 77.32  
 77.00  
 76.68  
 66.24  
 64.24  
 52.91  
 28.20  
 20.57

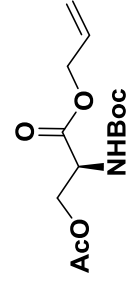

Current Data Parameters  
 NAME LTW-422  
 EXPNO 2  
 PROCNO 1  
 F2 - Acquisition Parameters  
 Date\_ 20140610  
 Time 14:00  
 INSTRUM spect  
 PROBHD 5 mm DUL 13C-1  
 PULPROG zgpg30  
 TD 65536  
 SOLVENT CDCl3  
 NS 151  
 DS 4  
 SWH 22727.273 Hz  
 FIDRES 0.346791 Hz  
 AQ 1.4418420 sec  
 RG 2050  
 DW 22.000 use  
 DE 30.00 use  
 TE 300.2 K  
 D1 2.0000000 sec  
 d11 0.0300000 sec  
 DELTA 1.8999998 sec  
 TDO 1  
 ===== CHANNEL f1 =====  
 NUC1 13C  
 P1 9.70 use  
 PL1 -0.50 dB  
 SFO1 100.6288660 MHz  
 ===== CHANNEL f2 =====  
 CPDPRG2 waltz16  
 NUC2 1H  
 PCPD2 90.00 use  
 PL2 -2.40 dB  
 PL12 15.10 dB  
 PL13 18.10 dB  
 SFO2 400.1516010 MHz  
 F2 - Processing parameters  
 SI 32768  
 SF 100.6178027 MHz  
 WDW EM  
 SSB 0  
 LB 0  
 GB 0  
 PC 1.00

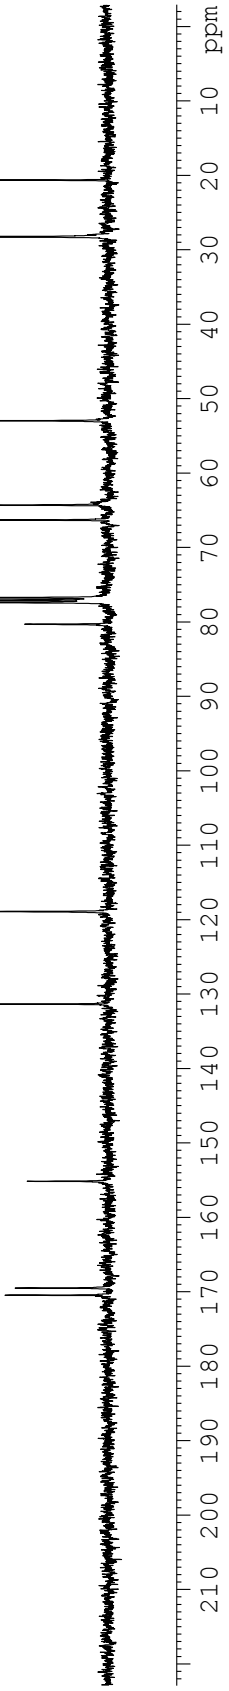

7.678  
7.670  
7.648  
7.643  
7.639  
7.634  
7.630  
7.624  
7.606  
7.586  
7.582  
7.584  
7.582  
7.575  
7.275  
7.266  
7.257  
7.253  
7.247  
7.244  
5.947  
5.933  
5.547  
5.538  
5.485  
4.875  
4.251  
4.235  
4.220  
4.089  
4.076  
4.063  
4.050  
3.965  
3.958  
3.732  
3.718  
3.710  
3.704  
3.690  
3.684  
3.631  
3.615  
3.598  
3.586  
3.318  
3.314  
3.310  
3.307  
3.303  
3.045  
2.914  
2.914  
2.907  
1.990

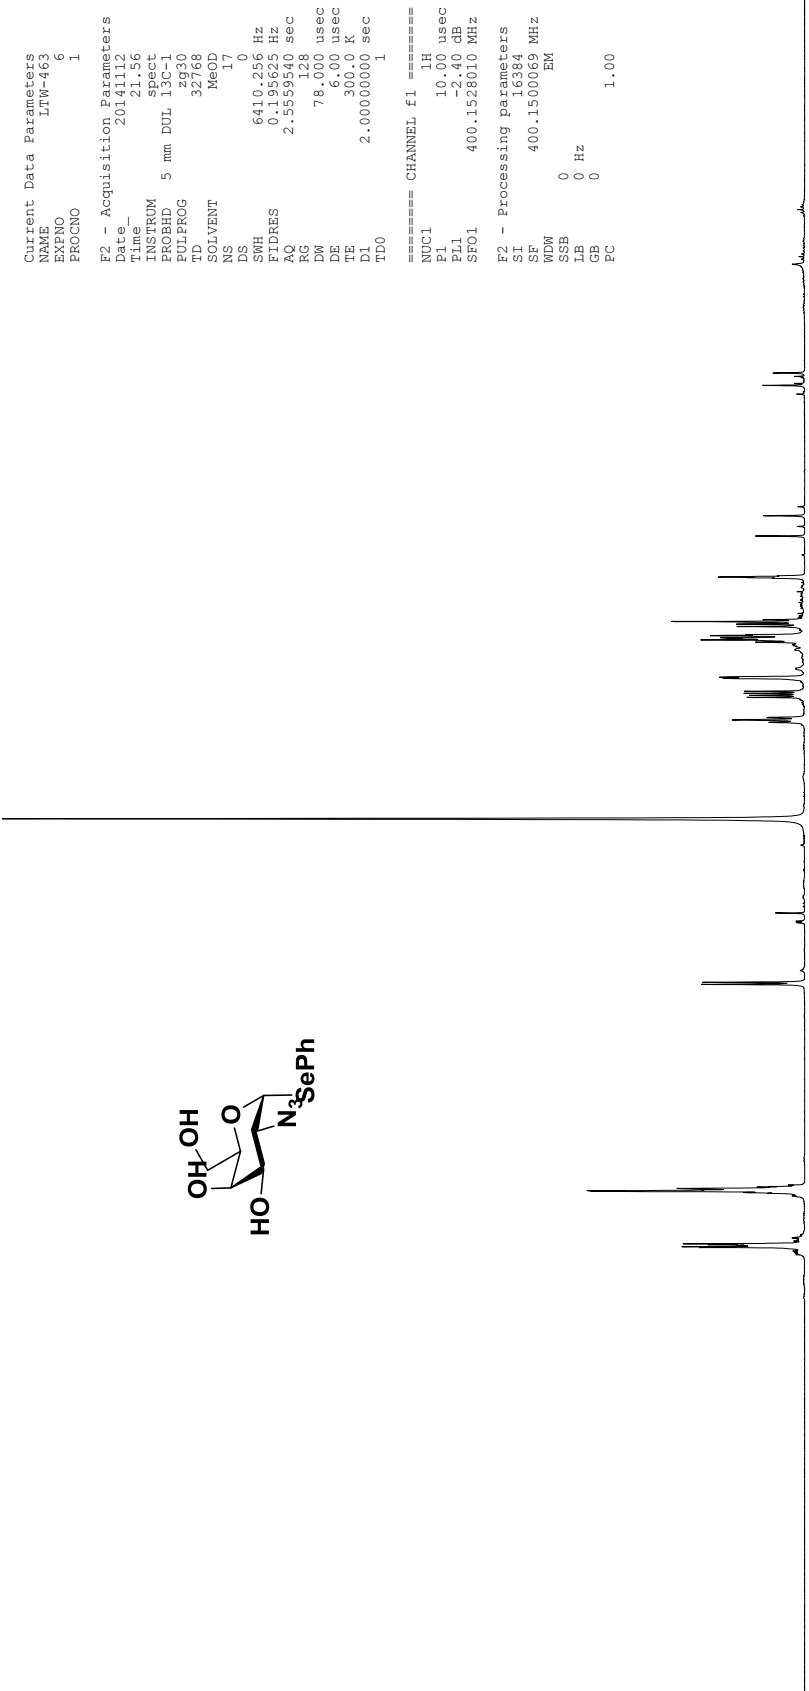

1.990  
 2.070  
 2.914  
 3.045  
 3.303  
 3.307  
 3.310  
 3.314  
 3.318  
 3.358  
 3.586  
 3.598  
 3.615  
 3.631  
 3.684  
 3.690  
 3.704  
 3.710  
 3.718  
 3.732  
 3.958  
 3.965  
 4.050  
 4.063  
 4.076  
 4.089  
 4.220  
 4.235  
 4.251  
 4.875  
 4.885  
 5.538  
 5.547  
 5.933  
 5.947  
 7.244  
 7.247  
 7.253  
 7.257  
 7.266  
 7.275  
 7.281  
 7.284  
 7.292  
 7.297  
 7.309  
 7.314  
 7.582  
 7.586  
 7.606  
 7.624  
 7.630  
 7.634  
 7.639  
 7.643  
 7.648  
 7.670  
 7.678

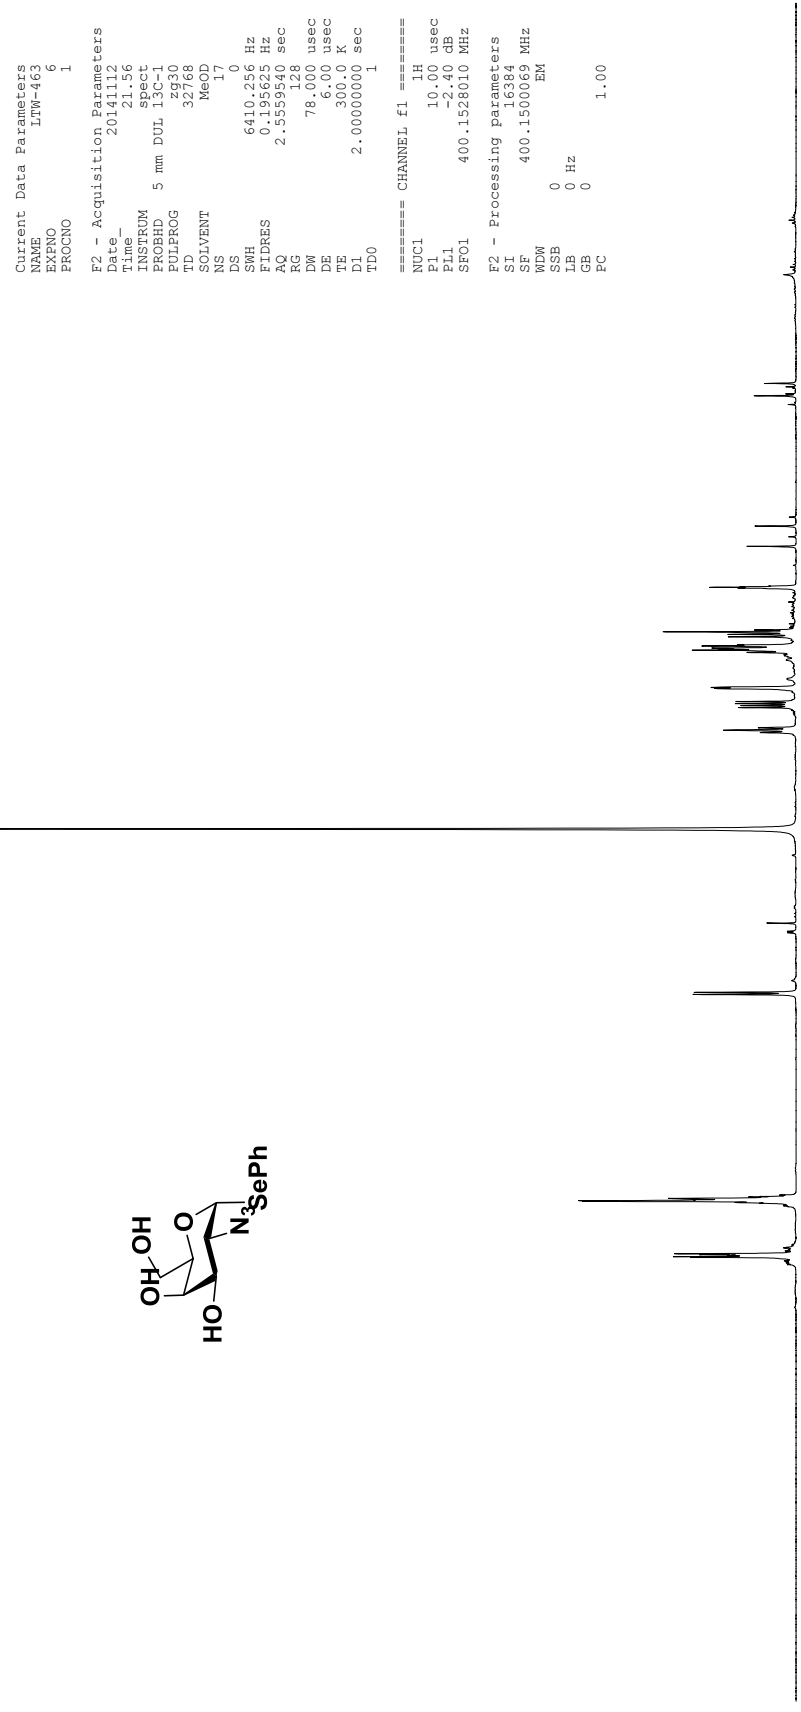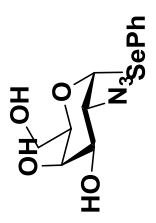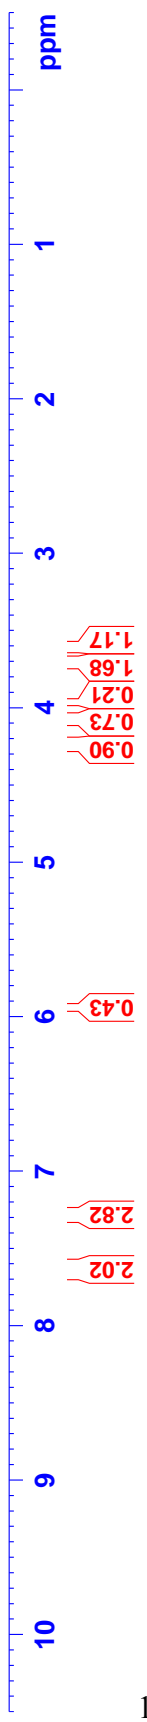

Supplement: c6ra12050d1.pdf [file c6ra12050d1.pdf]
